# Supplementary material
Source: PubMed Central journal article supplement (PMC3690857)
Supplement: 1221487110_pnas.201221487SI.pdf [file 1221487110_pnas.201221487SI.pdf]

# Supporting Information

Riedel et al. 10.1073/pnas.1221487110

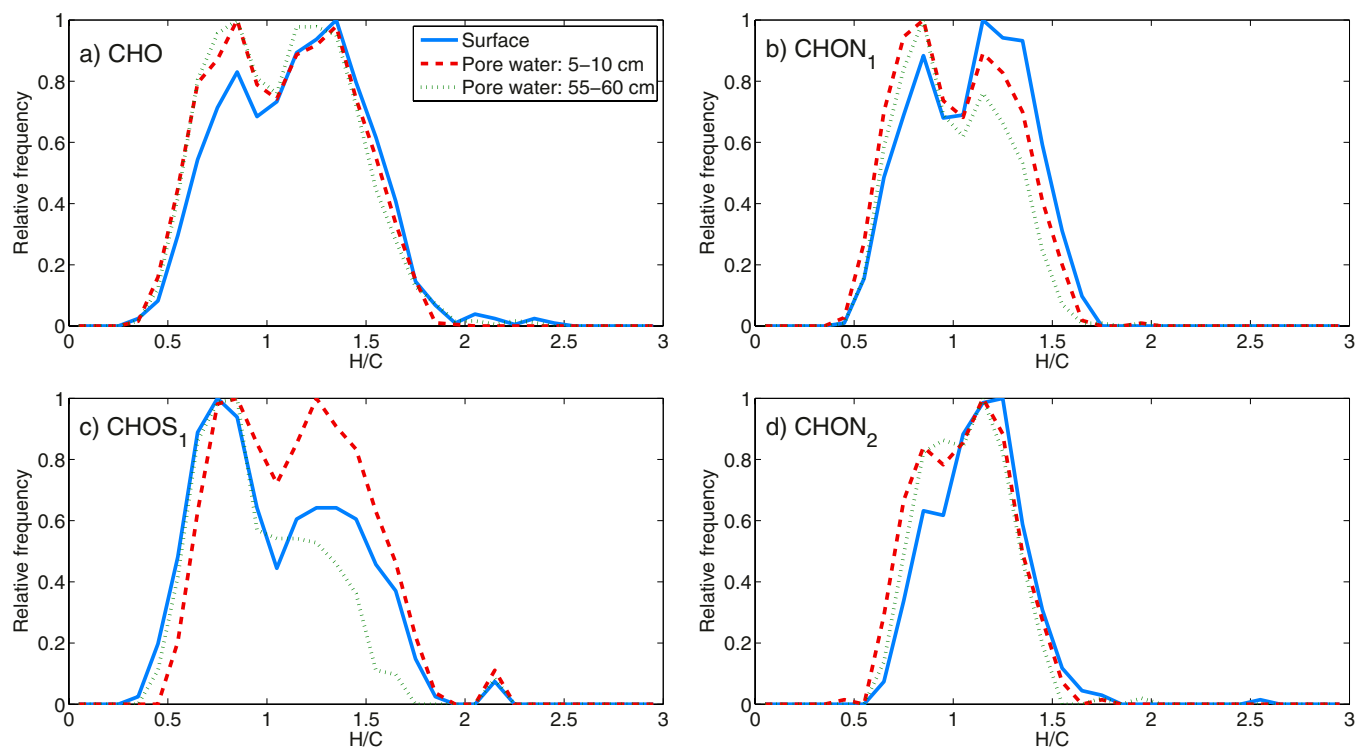

**Fig. S1.** Normalized distribution of elemental hydrogen-to-carbon (H/C) ratios of the surface and pore water samples, respectively, from the “Wendewiesen” site. Compound classes are sorted as in Table 2 and Fig. 1. The bimodal distribution of the H/C ratio relative frequency indicates the predominance of two distinct compound groups at Wendewiesen, one aromatic (low H/C ratio) and one aliphatic (high H/C ratio). Aromatic compounds were preferentially removed at the redox interface. Elemental ratios of all formulas not shared between pore and surface waters are further illustrated in Fig. S3.



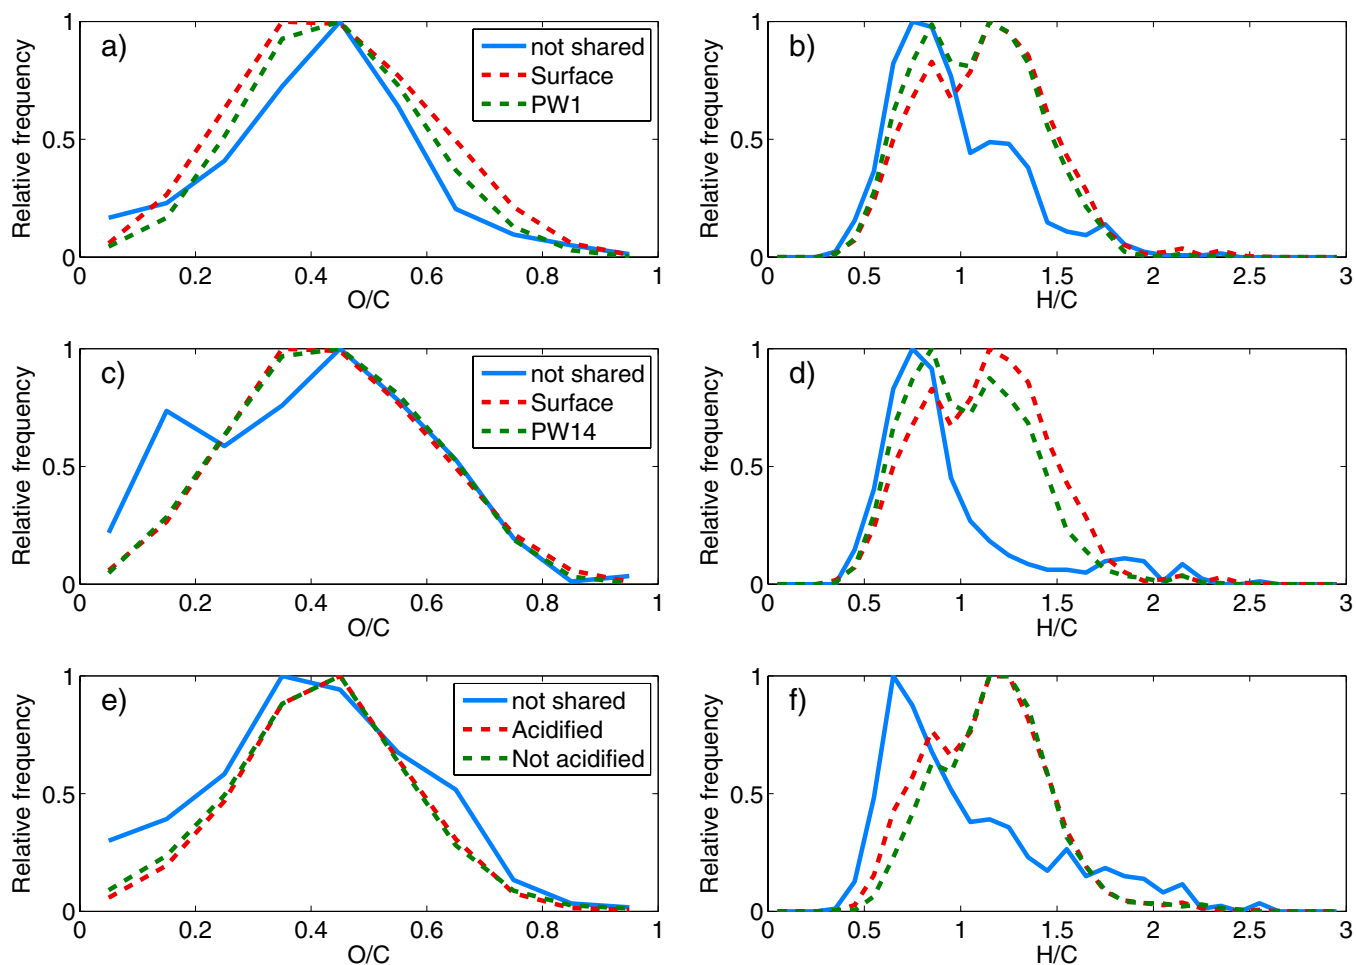

**Fig. 53.** Normalized distribution of elemental ratios for all formulas ( $\text{CHON}_0\text{-250-1P}_0\text{-1}$ ) found per sample and all formulas not shared between two samples. (A and B) Comparison of surface (red) and pore water (PW; green) samples taken at 5–10 cm at Wendewiesen. (C and D) Comparison of surface (red) and PW (green) samples taken at 55–60 cm at Wendewiesen. (E and F) Comparison of pore water sample from the “Zarnekow” site with (not acidified, green) and without Fe(III) precipitation (acidified, red). Elemental ratios of formulas not shared are shown in blue.

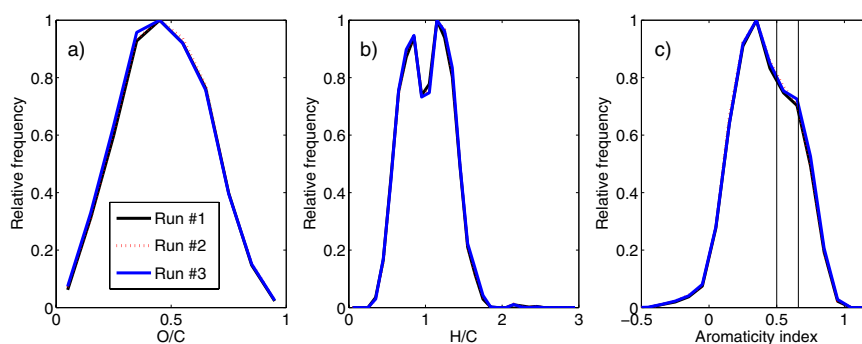

**Fig. 54.** Example of triplicate analysis of a sample to illustrate the precision of the ESI-FT-ICR-MS analysis. (A) Oxygen-to-carbon ratio; (B) Hydrogen-to-carbon ratio; (C) AI. The sample shown is a river water sample from another study extracted and measured using the same procedures used in this study. Number-averaged ratios ( $\pm 5\text{D}$ ) are as follows: O/C ratio:  $0.468 \pm 0.002$ , H/C ratio:  $1.029 \pm 0.002$ , percentage of formulas with aromaticity index  $> 0.5$ :  $34.8 \pm 0.4$ , and percentage of formulas with aromaticity index  $> 0.66$ :  $14.3 \pm 0.4$ .

**Table S1. Concentrations of dissolved iron and organic carbon before and after aeration of pore water samples from both sites and from different sampling campaigns**

| Site/date          | Before aeration   |                    | After aeration    |                    | Initial DOC/Fe | Fe removed, % | DOC removed, % |
|--------------------|-------------------|--------------------|-------------------|--------------------|----------------|---------------|----------------|
|                    | Fe, $\mu\text{M}$ | DOC, $\mu\text{M}$ | Fe, $\mu\text{M}$ | DOC, $\mu\text{M}$ |                |               |                |
| <b>Wendewiesen</b> |                   |                    |                   |                    |                |               |                |
| April 2004         | 411               | 6,667              | 23                | 4,583              | 16             | 94            | 31             |
| April 2004         | 536               | 6,500              | 20                | 4,417              | 12             | 96            | 32             |
| April 2004         | 304               | 5,500              | 23                | 3,750              | 18             | 92            | 32             |
| June 2004          | 839               | 9,167              | 5                 | 5,333              | 11             | 99            | 42             |
| June 2004          | 857               | 9,583              | 5                 | 5,333              | 11             | 99            | 44             |
| June 2004          | 482               | 7,500              | 7                 | 5,000              | 16             | 99            | 33             |
| September 2004     | 1,000             | 9,583              | 11                | 6,500              | 10             | 99            | 32             |
| September 2004     | 1,000             | 9,167              | 16                | 5,750              | 9              | 98            | 37             |
| September 2004     | 857               | 8,333              | 18                | 5,417              | 10             | 98            | 35             |
| November 2004      | 1,339             | 13,417             | 7                 | 8,667              | 10             | 99            | 35             |
| November 2004      | 857               | 10,333             | 7                 | 6,667              | 12             | 99            | 35             |
| November 2004      | 625               | 6,417              | 7                 | 4,417              | 10             | 99            | 31             |
| June 2008          | 261               | 5,167              | 4                 | 3,750              | 20             | 98            | 27             |
| June 2008          | 305               | 6,500              | 5                 | 4,750              | 21             | 98            | 27             |
| June 2008          | 250               | 8,250              | 7                 | 6,833              | 33             | 97            | 17             |
| July 2011          | 393               | 6,917              | 30                | 5,667              | 18             | 92            | 18             |
| July 2011          | 411               | 9,333              | 30                | 7,167              | 23             | 93            | 23             |
| July 2011          | 464               | 8,833              | 34                | 6,917              | 19             | 93            | 22             |
| July 2012          | 261               | 5,417              | 20                | 4,083              | 21             | 92            | 25             |
| July 2012          | 321               | 6,250              | 8                 | 4,583              | 19             | 98            | 27             |
| July 2012          | 286               | 6,330              | 18                | 4,333              | 22             | 94            | 32             |
| <b>Zarnekow</b>    |                   |                    |                   |                    |                |               |                |
| May 2005           | 1,661             | 17,333             | 21                | 12,417             | 10             | 99            | 28             |
| May 2005           | 1,679             | 18,500             | 23                | 13,583             | 11             | 99            | 27             |
| May 2005           | 1,696             | 20,667             | 39                | 15,917             | 12             | 98            | 23             |
| June 2005          | 1,625             | 16,667             | 25                | 12,500             | 10             | 98            | 25             |
| June 2005          | 1,607             | 18,333             | 29                | 12,500             | 11             | 98            | 32             |
| June 2005          | 1,607             | 20,000             | 45                | 15,000             | 12             | 97            | 25             |
| July 2005          | 1,304             | 19,000             | 29                | 14,083             | 15             | 98            | 26             |
| July 2005          | 1,321             | 21,500             | 38                | 15,083             | 16             | 97            | 30             |
| July 2005          | 1,321             | 20,333             | 41                | 16,500             | 15             | 97            | 19             |
| May 2011           | 459               | 11,833             | 7                 | 10,250             | 26             | 98            | 13             |
| May 2011           | 1,446             | 16,500             | 6                 | 12,583             | 11             | 100           | 24             |
| May 2011           | 929               | 14,083             | 5                 | 11,750             | 15             | 99            | 17             |
| July 2011          | 661               | 13,583             | 12                | 12,167             | 21             | 98            | 10             |
| July 2011          | 1,821             | 19,833             | 9                 | 14,500             | 11             | 100           | 27             |
| July 2011          | 875               | 17,083             | 12                | 14,250             | 20             | 99            | 17             |
| November 2011      | 275               | 8,583              | 7                 | 5,917              | 31             | 98            | 31             |
| November 2011      | 375               | 5,917              | 3                 | 4,667              | 16             | 99            | 21             |
| November 2011      | 338               | 6,917              | 5                 | 5,333              | 20             | 99            | 23             |
| July 2012          | 320               | 8,917              | 6                 | 7,083              | 28             | 98            | 21             |
| July 2012          | 446               | 6,667              | 4                 | 4,833              | 15             | 99            | 28             |
| July 2012          | 393               | 10,667             | 12                | 8,083              | 27             | 97            | 24             |

DOC, dissolved organic carbon.
